# Supplementary material for: Synthesis of Indigo-Dyes from Indole Derivatives by Unspecific Peroxygenases and Their Application for In-Situ Dyeing
Source: MDPI journal article supplement (doi:10.3390/catal11121495), 2021-12-09

## Supplementary Material

Synthesis of Tyrian purple and other indigo-dyes from corresponding indole derivatives by unspecific peroxygenases and their application for *in situ* dyeing

René Ullrich<sup>1, §</sup>, Marzena Poraj-Kobielska<sup>1, §</sup>, Owik M. Herold-Majumdar<sup>2, §</sup>, Jesper Vind<sup>2</sup> and Martin Hofrichter<sup>1\*</sup>

<sup>1)</sup> *Department of Bio- and Environmental Sciences, TU Dresden - International Institute Zittau, Markt 23, 02763 Zittau, Germany*

<sup>2)</sup> *Novozymes A/S, Krogshøjvej 36, 2880 Bagsvaerd, Denmark*

<sup>§</sup> These authors contributed equally

\*corresponding author, e-mail: [martin.hofrichter@tu-dresden.de](mailto:martin.hofrichter@tu-dresden.de)

**Table S1.** Applied oligomers for *rHin*UPO mutants.

|       |                                                  |
|-------|--------------------------------------------------|
| A55L  | AACGGATTGAACATCAACAAGACTCTCGCATCCGCGTTGTTGATTTCG |
| N71Q  | CTCATGACATCGCCCAAGCCGCAGGCAACAACCTTCTCCCTCAACG   |
| I154V | TTCATGTCGGAGCTCGGCAACGTCTTCACTTACGGTGAGTCGGTCG   |
| W183I | AACAGGCGCTGGGTCGAGTATATCTTCGAGAACGAGCGCCTCCC     |
| W183V | AACAGGCGCTGGGTCGAGTATGTCTTCGAGAACGAGCGCCTCCC     |

**Figure S1.** A – HPLC elution profiles (280 nm) of micro-aerobic reaction solutions ( $N_2$ -flushed) containing 500  $\mu$ M indoxyl acetate (**IA**) in 5 % ACN / 50 mM PPB pH 7 (pink line); 20 min after addition of esterase (green line), and after aeration (blue line). Right: photographs of the respective reaction solutions in HPLC-vials. B – HPLC elution profiles of reaction solution A, but in presence of 10% ACN and 500  $\mu$ M 2-oxindole (**II**). C – HPLC elution profiles of a reaction solution containing 0.04 U mL<sup>-1</sup> *Aae*UPO and 500  $\mu$ M indole (**I**) in 5% ACN / 50 mM PPB pH 7 under micro-aerobic conditions (pinkish line) and after addition of 500  $\mu$ M H<sub>2</sub>O<sub>2</sub> and incubation for 20 min (green line). **III** - indoxyl, **IV** - indigo, **XI**, **XII**, **XV** and **XIV** - unidentified products.

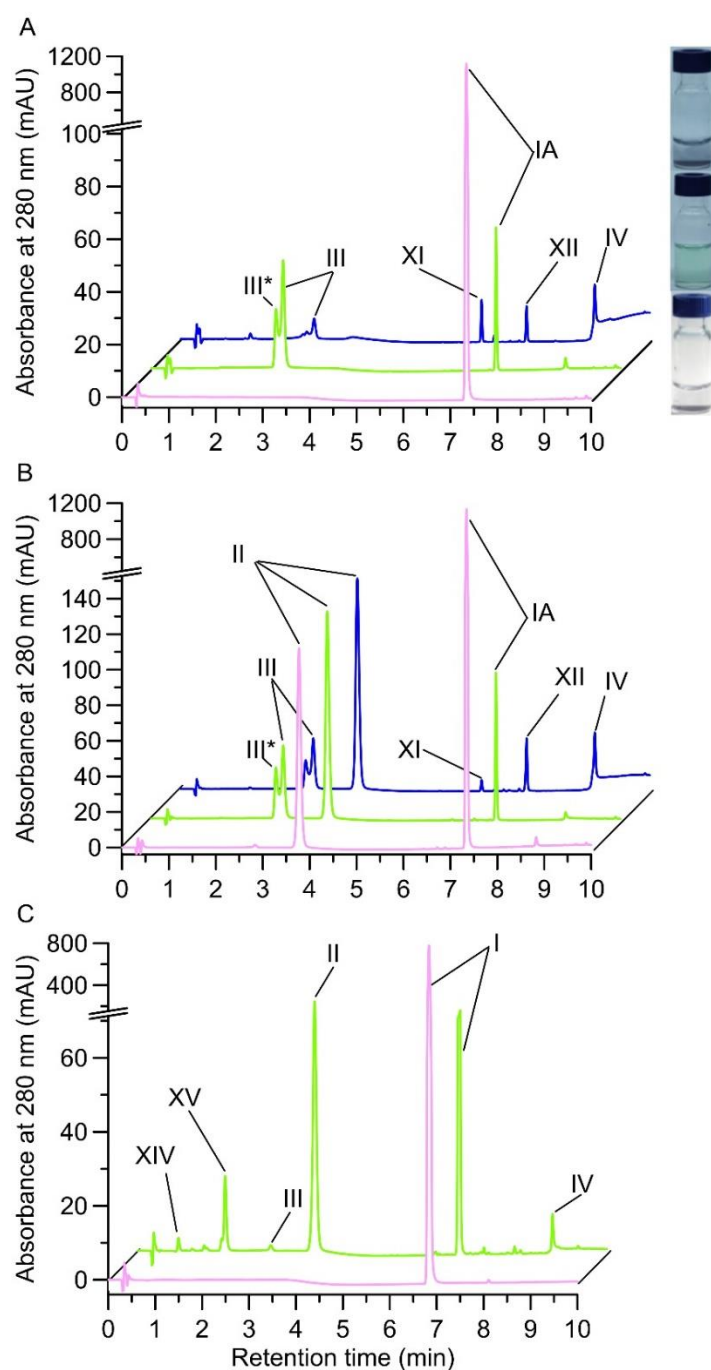

**Figure S2.** Mass and UV-Vis spectra of an indole standard (I) and several of its oxidation products: 2-oxindole (II), indoxyl (III), putative dimeric indoxyl (III\*) and indigo (IV). IA shows the respective spectra of indoxyl acetate (standard), XI-XIII and XV represent unknown byproducts and XIV is a hydroxylated 2-oxindol with unclear position of the hydroxyl group.

### I Indol

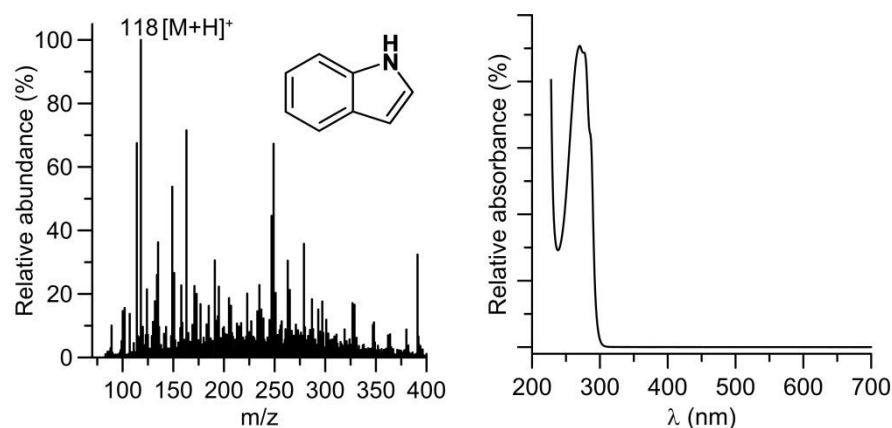

### II 2-Oxindol

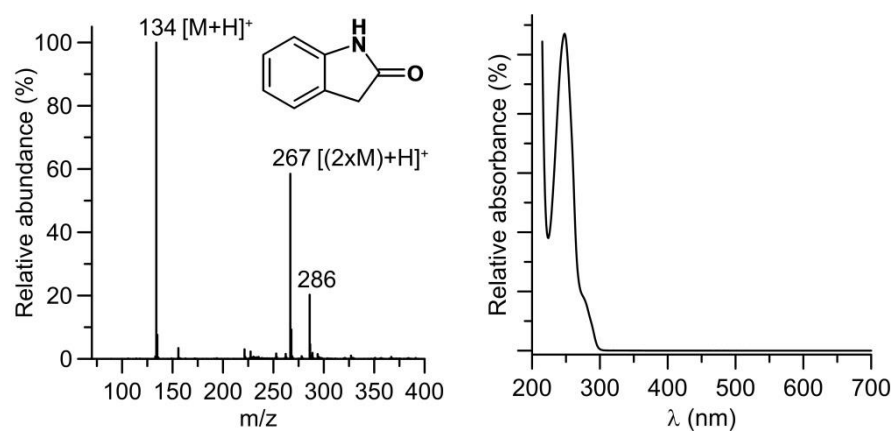

### III Indoxyl (2.8 min)

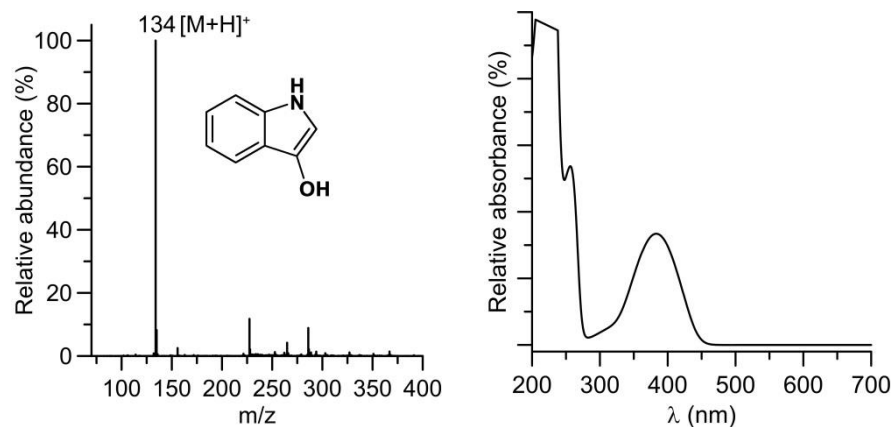

### III\* dimeric Indoxyl (2.5 min)

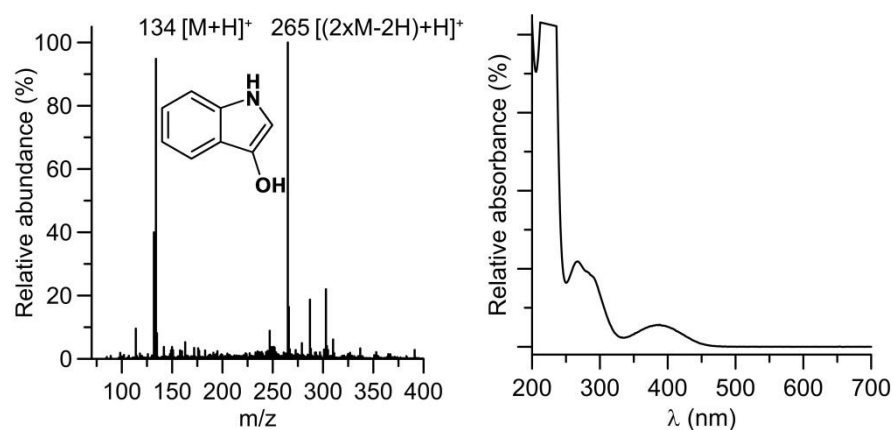

### IV Indigo

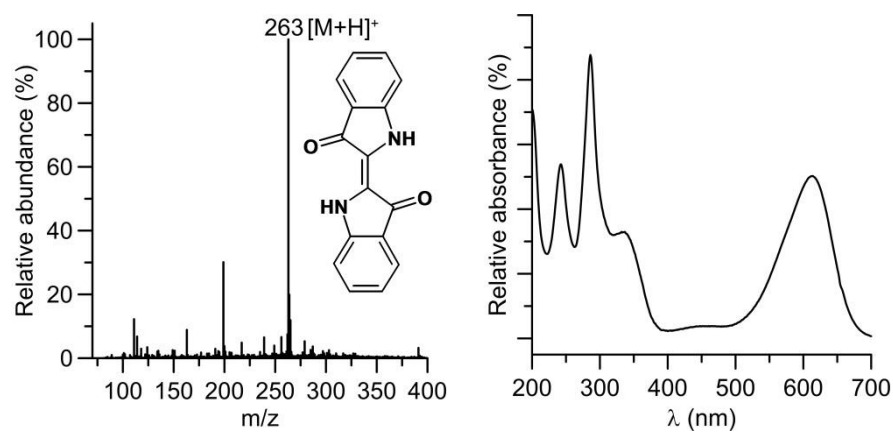

### IA Indoxylacetate

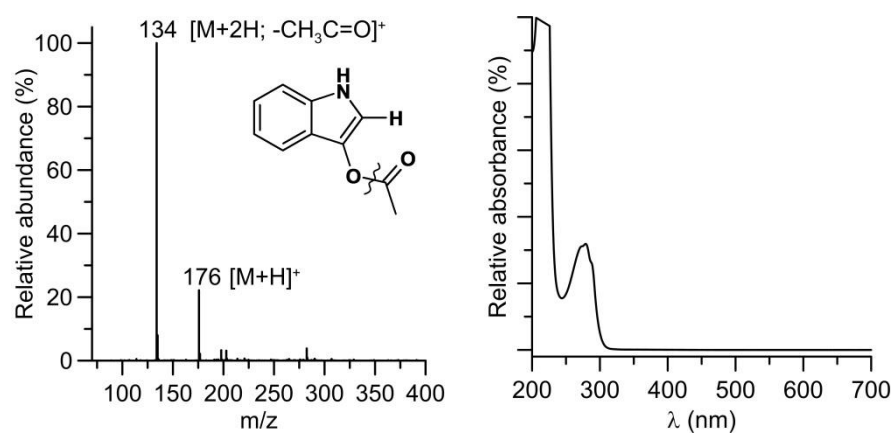

### XI product

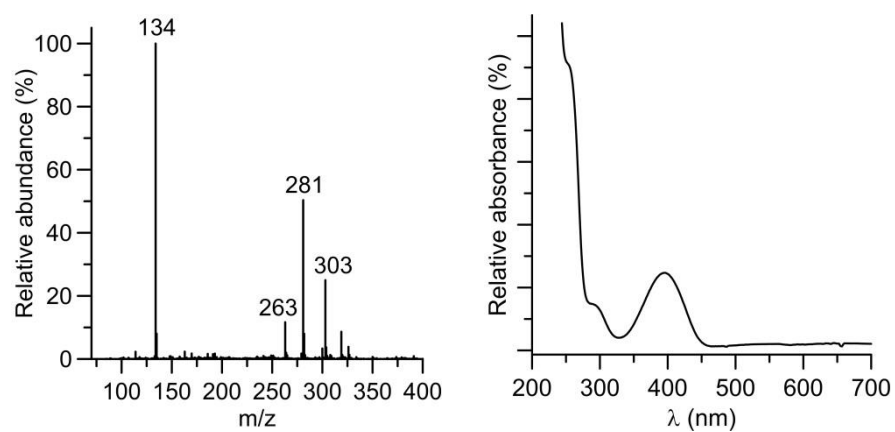

### XII product

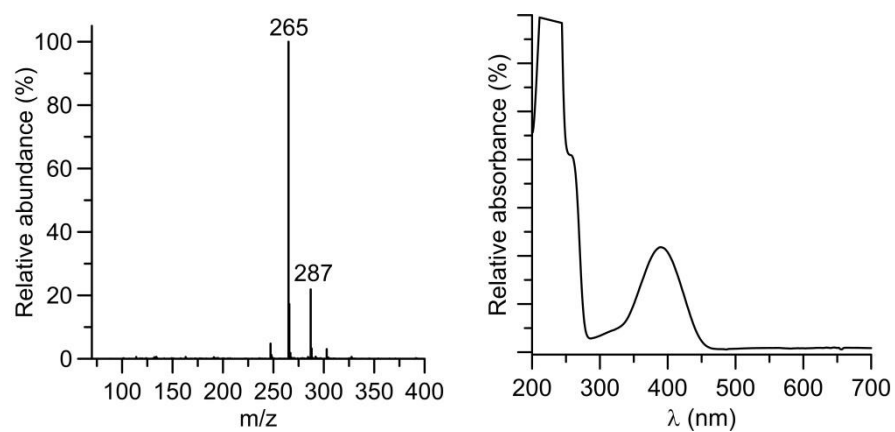

### XIII product (in presence of ascorbic acid)

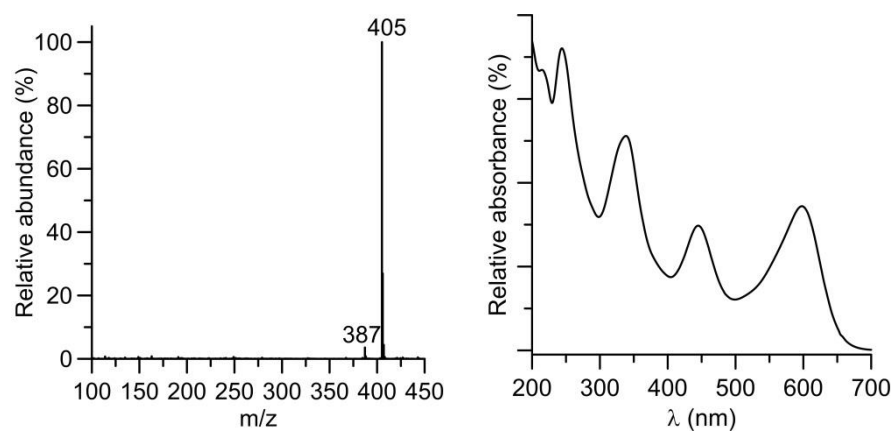

XIV product (Hydroxy-2-oxindol)

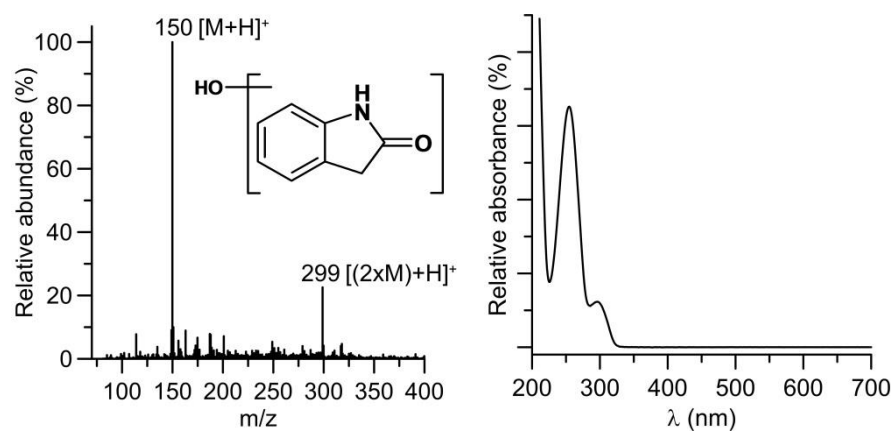

XV product

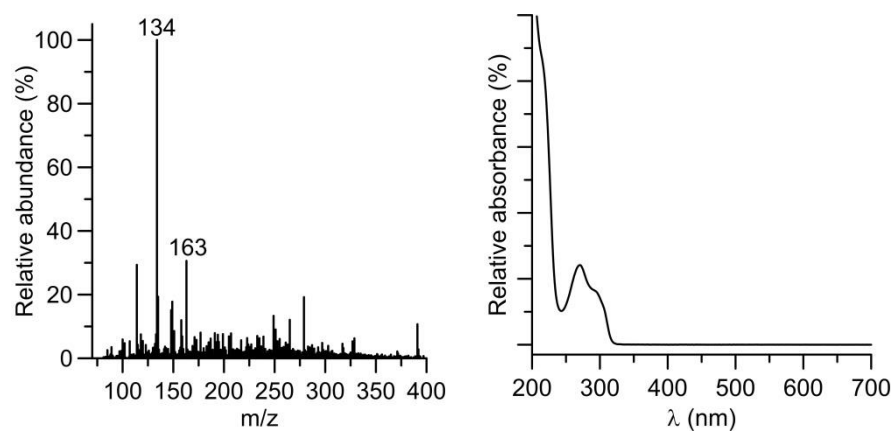

**Figure S3.** HPLC elution profiles of a reaction solution containing 2 U mL<sup>-1</sup> *Aae*UPO and 500  $\mu$ M 2-oxindole (**II**) in 5% ACN / 50 mM PPB pH 7 (pink line), after addition of 500  $\mu$ M H<sub>2</sub>O<sub>2</sub> under micro-aerobic (green line) or aerobic conditions (blue line). Photographs on the right show the respective reaction solutions in HPLC-vials.

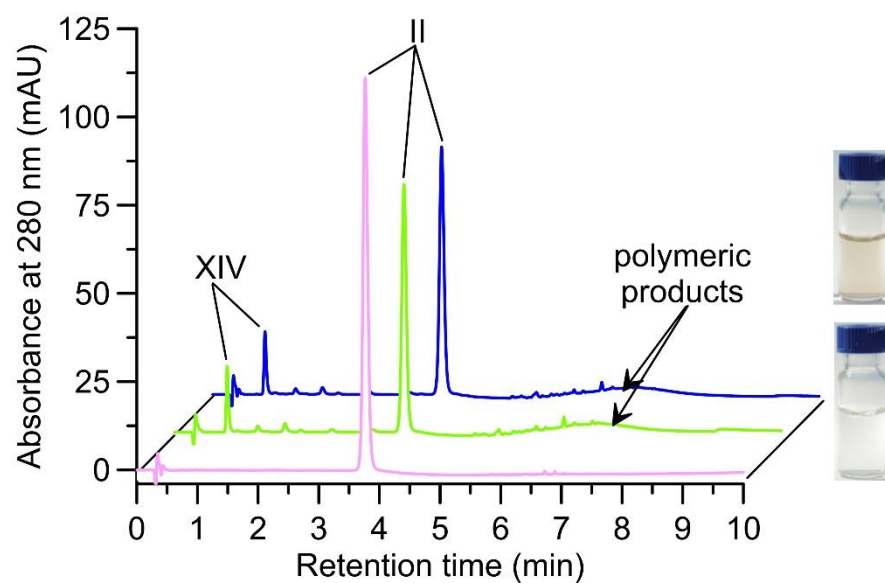



**Figure S4.** Influence of the pH on the conversion of indole (5.725 mM) by *rHinUPO* (0.01 mg mL<sup>-1</sup>) in a Britton-Robinson buffered solution. The formation of indigo was calculated using mathematical formula (1). All further details are described in the materials and methods section.

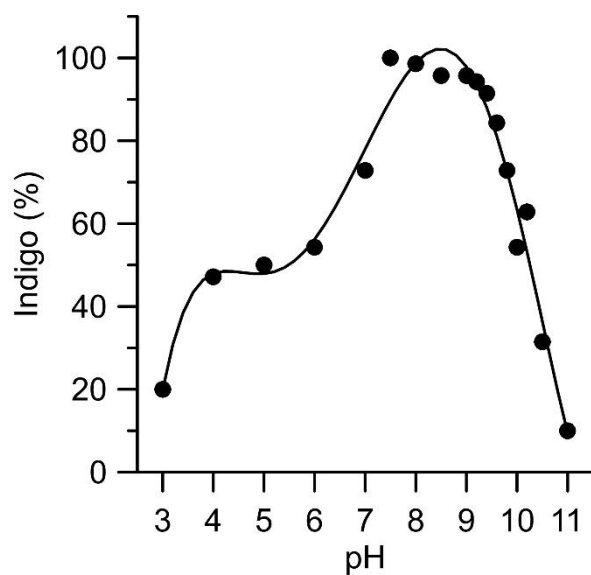

Figure 1 shows a 3x9 grid of microtiter plate wells. The rows are labeled *rHinUPO*, *AaeUPO*, and *rCciUPO*. The columns are grouped by substrate and pH. The first three columns are for 5-Br-indoline at pH 5.0, 7.0, and 9.0. The next three columns are for 5-Br-indole at pH 5.0, 7.0, and 9.0. The color of the wells indicates UPO activity, with blue representing high activity and yellow representing low activity. *rHinUPO* shows high activity (blue) across all conditions. *AaeUPO* and *rCciUPO* show low activity (yellow) at pH 5.0 and 7.0, but high activity (blue) at pH 9.0.

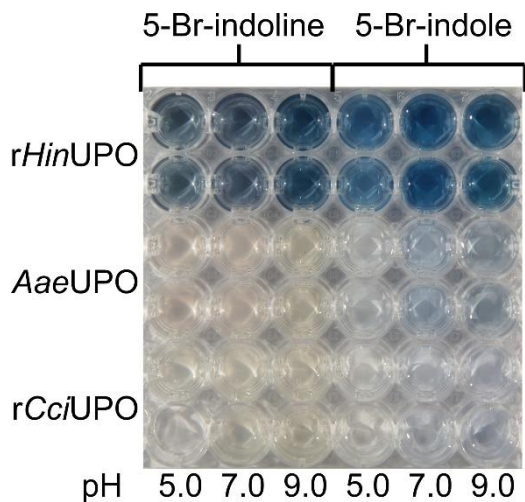

**Figure S6.** Vis-spectra of dyes produced from 5-bromoindoline (A-C) and 5-bromoindole (D-F) by *Hin*UPO (A;D), *Aae*UPO (B;E) and *Cci*UPO (C;F) (35 mg L<sup>-1</sup>) at different pH values: 5.0 (red), 7.0 (green) and 9.0 (blue). Reactions were started by addition of H<sub>2</sub>O<sub>2</sub> (800 μM in the case of 5-bromoindoline and 400 μM in the case of 5-bromoindole) and proceeded over two hours at 23°C.

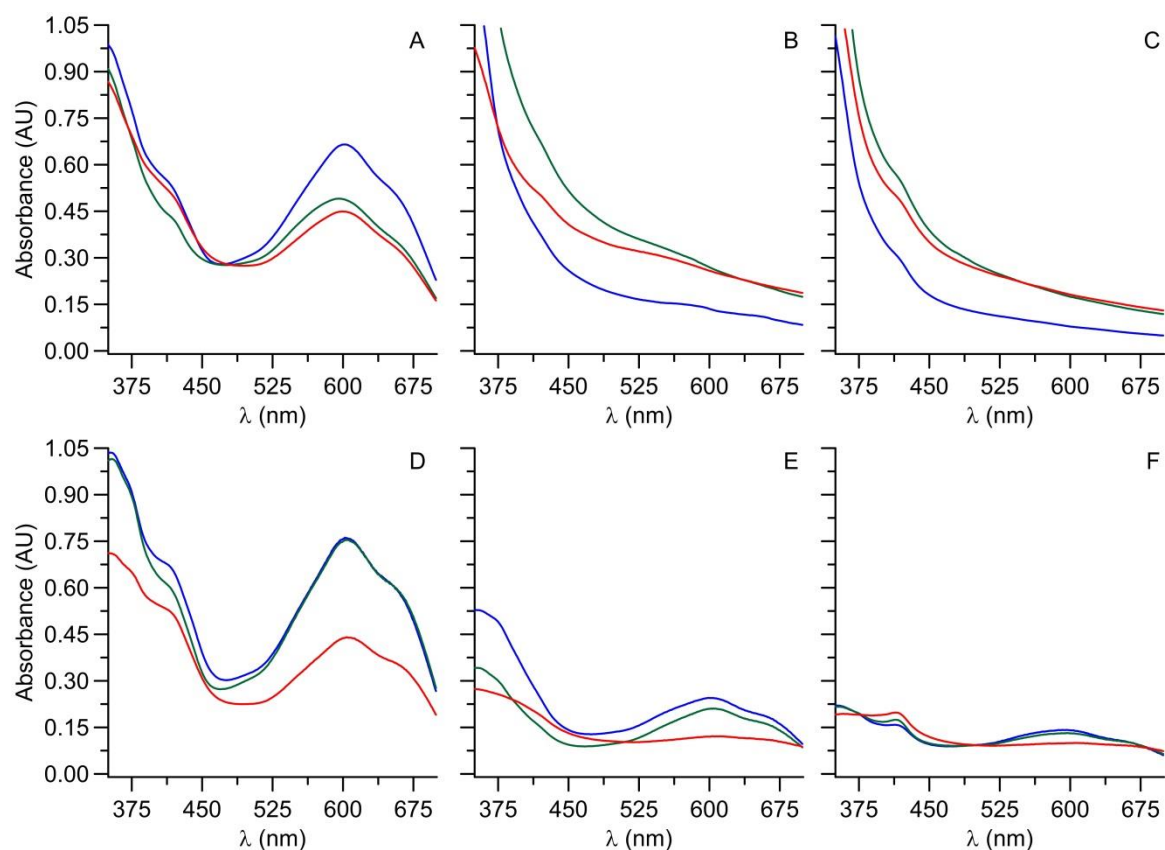

**Figure S7.** Structure of *Mro*UPO (pdb5FUK) with flanking helices.

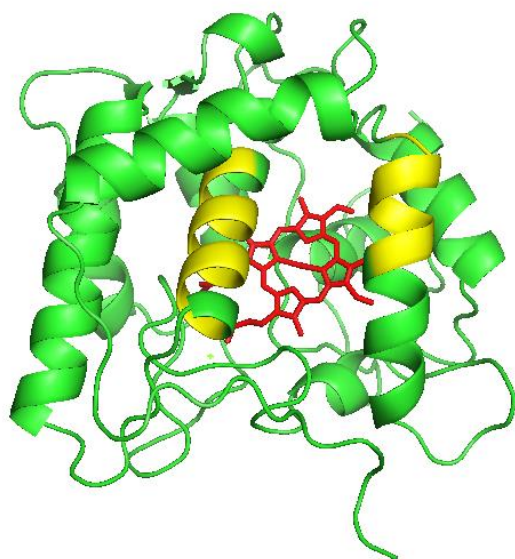

Supplement: s1 [file s1]
